# Supplementary material for: Theoretical prediction of a transient accumulation of nanoparticles at a well-defined distance from an electrified liquid–solid interface
Source: Royal Society of Chemistry journal article supplement (doi:10.1039/c8nr05055d), 2018-01-01
Supplement: c8nr05055d1.pdf [file c8nr05055d1.pdf]

**There is no supplementary information available for this article**
